# Supplementary material for: Translation of Color Fundus Photography into Fluorescein Angiography Using Deep Learning for Enhanced Diabetic Retinopathy Screening
Source: PubMed Central journal article supplement — Ophthalmol Sci. 2023 Sep 15;3(4):100401. doi: 10.1016/j.xops.2023.100401 (PMC10630672; doi:10.1016/j.xops.2023.100401), 2023-09-15

Figure S1. Demonstration of the grading criteria. The quality of translated images was evaluated subjectively using a scale of 1 to 5 (1 = excellent, 2 = good, 3 = normal, 4 = poor, and 5 = very poor), with a score of 1 referring to the image quality of the real fundus fluorescein angiography (FFA) image. The grading process considered overall realism, the realism of anatomical structures, and the accuracy of pathological lesions in the translated images.

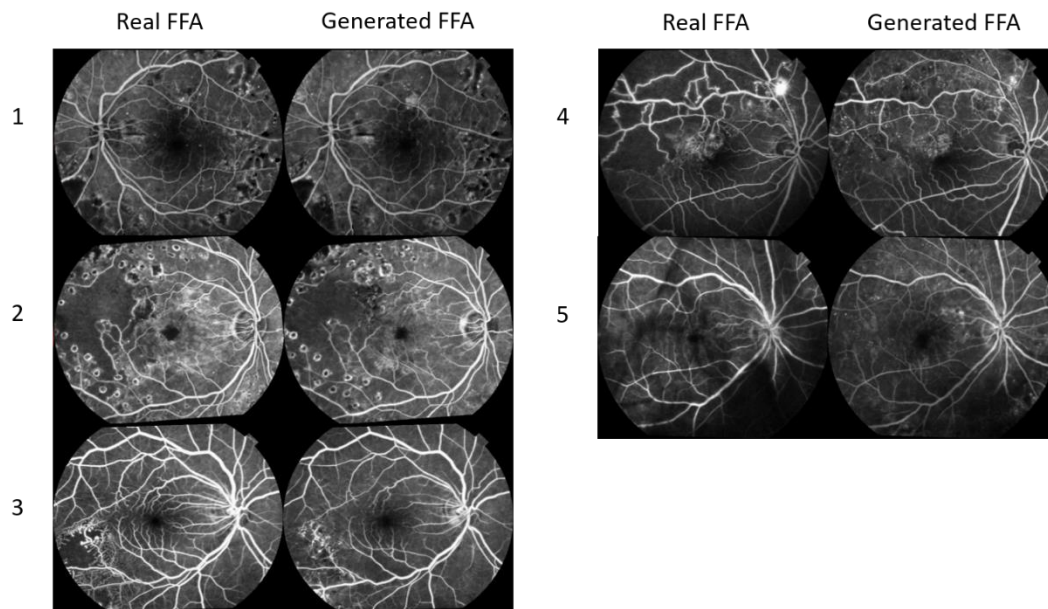

Figure S2. Demonstration of unsatisfactory translated fundus fluorescein angiography (FFA). 1-2 rows: internal test set. 3-4 rows: external test set. Lesions that were not prominent on color fundus (CF) images, such as microaneurysms and non-perfusion, occasionally failed to be reliably generated. Additionally, blurry CF images could result in blurry translated structures in the generated FFA images, and more critically, could lead to false positive microaneurysm generation.

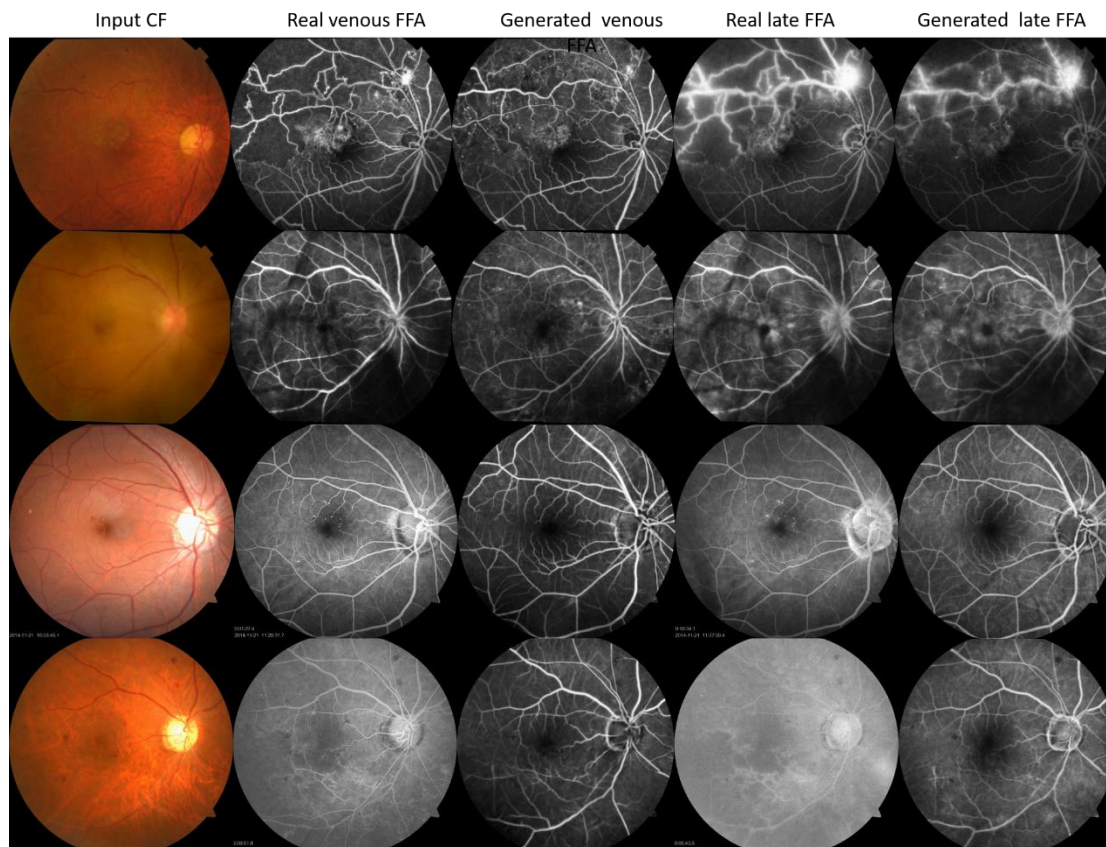

Figure S3. Examples of generation for other common retinal diseases. 1<sup>st</sup> row, polypoidal choroidal vasculopathy, 2<sup>nd</sup> row, central serous chorioretinopathy, 3<sup>rd</sup> row, otherwise normal fundus, 4<sup>th</sup> row, wet age-related degeneration, 5<sup>th</sup> row, retinitis pigmentosa, 6<sup>th</sup> row, retinal vein occlusion.

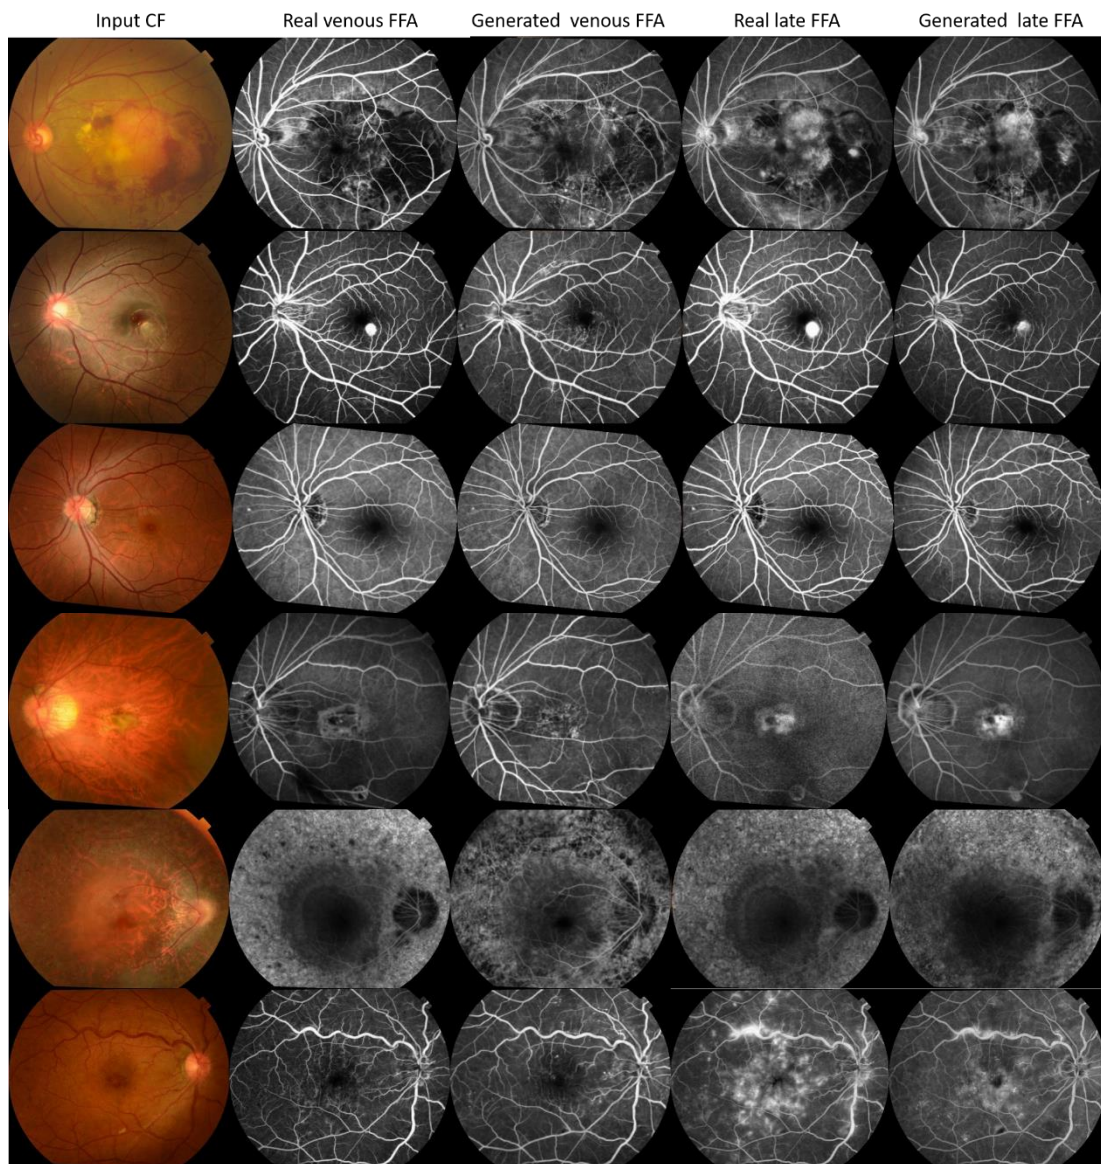

Supplement: mmc1.pdf [file mmc1.pdf]
