# Supplementary material for: Translation of Color Fundus Photography into Fluorescein Angiography Using Deep Learning for Enhanced Diabetic Retinopathy Screening
Source: PubMed Central journal article supplement — Ophthalmol Sci. 2023 Sep 15;3(4):100401. doi: 10.1016/j.xops.2023.100401 (PMC10630672; doi:10.1016/j.xops.2023.100401), 2023-09-15
Supplement: mmc2.pdf [file mmc2.pdf]

Table S1. The full spectrum of other eye diseases in the dataset extracted from fundus fluorescein angiography reports.

| Diagnosis                                | N           |
|------------------------------------------|-------------|
| please combine with clinical information | 611 (13.8%) |
| media opacity                            | 136 (3.1%)  |
| choroidal neovascularization             | 125 (2.8%)  |
| branch retinal vein occlusion            | 102 (2.3%)  |
| retinal pigment epithelial detachment    | 100 (2.3%)  |
| pathologic myopia                        | 78 (1.8%)   |
| central serous chorioretinopathy         | 67 (1.5%)   |
| epiretinal membrane                      | 45 (1.0%)   |
| familial exudative vitreoretinopathy     | 45 (1.0%)   |
| wet age-related macular degeneration     | 42 (0.9%)   |
| retinitis pigmentosa                     | 42 (0.9%)   |
| polypoidal choroidal vasculopathy        | 42 (0.9%)   |
| vasculitis                               | 39 (0.9%)   |
| central retinal vein occlusion           | 38 (0.9%)   |
| panuveitis                               | 27 (0.6%)   |
| intermediate uveitis                     | 23 (0.5%)   |
| retinal telangiectasia                   | 21 (0.5%)   |
| Behcet disease                           | 15 (0.3%)   |
| choroidal mass                           | 15 (0.3%)   |
| Coat's disease                           | 15 (0.3%)   |
| white dot syndrome                       | 13 (0.3%)   |
| Eales' disease                           | 13 (0.3%)   |
| retinal artery occlusion                 | 12 (0.3%)   |
| Vogt-Koyanagi-Harada disease             | 12 (0.3%)   |
| Von Hippel-Lindau Syndrome               | 10 (0.2%)   |
| central retinal artery occlusion         | 10 (0.2%)   |
| hypertensive retinopathy                 | 8 (0.2%)    |
| macroaneurysm                            | 8 (0.2%)    |
| macular hole                             | 7 (0.2%)    |
| myelinated retinal nerve fiber layer     | 7 (0.2%)    |
| acute retinal necrosis                   | 6 (0.1%)    |
| dry age-related macular degeneration     | 3 (0.1%)    |
| anterior ischemic optic neuropathy       | 3 (0.1%)    |
| Stargardt disease                        | 3 (0.1%)    |
| congenital coloboma                      | 3 (0.1%)    |
| choroidal rupture                        | 3 (0.1%)    |
| rhegmatogenous retinal detachment        | 3 (0.1%)    |
| choroidal nevus                          | 2 (0.0%)    |
| silicone-oil-tamponade                   | 2 (0.0%)    |
| choroidal osteoma                        | 1 (0.0%)    |

---

|                                    |          |
|------------------------------------|----------|
| Best vitelliform macular dystrophy | 1 (0.0%) |
| retinal angiomatous proliferation  | 1 (0.0%) |
| cilioretinal artery occlusion      | 1 (0.0%) |
| geographic atrophy                 | 1 (0.0%) |
| serpiginous choroiditis            | 1 (0.0%) |
| ocular ischemic syndrome           | 1 (0.0%) |
| angioid streak                     | 1 (0.0%) |
| choroidal hemangioma               | 1 (0.0%) |
| toxocariasis                       | 1 (0.0%) |
| pseudopapilledema                  | 1 (0.0%) |
| macular ectopia                    | 1 (0.0%) |
| morning glory syndrome             | 1 (0.0%) |

---
